# Supplementary material for: The Role of Parents’ Native and Migrant Contacts on the Labour Market in the School-to-Work Transition of Adolescents in Germany
Source: Oxford University Press journal article supplement (doi:10.1093/esr/jcac022), 2022-04-29
Supplement: jcac022_supplementary_data.pdf [file jcac022_supplementary_data.pdf]

## The role of parents' native and migrant contacts in the labour market in the school-to-work transition of adolescents in Germany

Tobias Roth & Markus Weissmann

Table A1: Mean values or percentages and number of cases of the key variables in the analyses without multiple imputation

| Variables                               | Mean or percent | Number of cases |
|-----------------------------------------|-----------------|-----------------|
| All                                     |                 |                 |
| Share of adolescents in dual VET (in %) | 44.5            | 2,206           |
| Number of named occupations: natives    | 6.9             | 2,152           |
| Number of named occupations: migrants   | 0.7             | 2,152           |
| Total number of named occupations       | 7.7             | 2,152           |
| Average ISEI of all named occupations   | 55.8            | 2,150           |
| Natives                                 |                 |                 |
| Share of adolescents in dual VET (in %) | 47.9            | 1,780           |
| Number of named occupations: natives    | 7.6             | 1,740           |
| Number of named occupations: migrants   | 0.3             | 1,740           |
| Total number of named occupations       | 7.8             | 1,740           |
| Average ISEI of all named occupations   | 55.9            | 1,737           |
| Migrants                                |                 |                 |
| Share of adolescents in dual VET (in %) | 30.3            | 426             |
| Number of named occupations: natives    | 4.2             | 412             |
| Number of named occupations: migrants   | 2.7             | 412             |
| Total number of named occupations       | 7.0             | 412             |
| Average ISEI of all named occupations   | 55.6            | 413             |
| 1st generation                          |                 |                 |
| Share of adolescents in dual VET (in %) | 25.9            | 85              |
| Number of named occupations: natives    | 3.3             | 82              |
| Number of named occupations: migrants   | 3.4             | 82              |
| Total number of named occupations       | 6.8             | 82              |
| Average ISEI of all named occupations   | 53.6            | 84              |
| 2nd generation                          |                 |                 |
| Share of adolescents in dual VET (in %) | 28.8            | 160             |
| Number of named occupations: natives    | 2.9             | 153             |
| Number of named occupations: migrants   | 3.8             | 153             |
| Total number of named occupations       | 6.8             | 153             |
| Average ISEI of all named occupations   | 56.2            | 154             |
| 2.5 generation                          |                 |                 |
| Share of adolescents in dual VET (in %) | 33.7            | 181             |
| Number of named occupations: natives    | 5.8             | 177             |
| Number of named occupations: migrants   | 1.4             | 177             |
| Total number of named occupations       | 7.2             | 177             |
| Average ISEI of all named occupations   | 56.0            | 175             |

Source: National Educational Panel Study (NEPS): Starting Cohort 4, authors' own calculations. Only respondents that have searched for a vocational training position are included.

Table A2: Linear probability regressions of being in dual VET in December 2012

|                                                             | Model 1              | Model 2             | Model 3a<br>(natives) | Model 3b<br>(migrants) |
|-------------------------------------------------------------|----------------------|---------------------|-----------------------|------------------------|
| Migrant generation (ref.: natives)                          |                      |                     |                       |                        |
| 1st generation                                              | -0.220***<br>(0.045) | -0.165**<br>(0.050) |                       |                        |
| 2nd generation                                              | -0.175***<br>(0.033) | -0.111**<br>(0.042) |                       | 0.061<br>(0.054)       |
| 2.5 generation                                              | -0.095**<br>(0.033)  | -0.075*<br>(0.034)  |                       | 0.124*<br>(0.059)      |
| Number of named occupations                                 |                      |                     |                       |                        |
| Natives                                                     |                      | 0.011**<br>(0.004)  | 0.010*<br>(0.004)     | 0.014+<br>(0.008)      |
| Migrants                                                    |                      | -0.005<br>(0.007)   | -0.018<br>(0.015)     | 0.003<br>(0.010)       |
| Average ISEI of all named occupations                       |                      | -0.003*<br>(0.001)  | -0.003*<br>(0.001)    | -0.003<br>(0.002)      |
| Male                                                        | 0.247***<br>(0.020)  | 0.249***<br>(0.020) | 0.273***<br>(0.022)   | 0.156***<br>(0.046)    |
| Books in household                                          | -0.005<br>(0.008)    | -0.005<br>(0.008)   | -0.001<br>(0.009)     | -0.024<br>(0.019)      |
| Parents' highest education (ref.: lower secondary or below) |                      |                     |                       |                        |
| Intermediate secondary (+ VET)                              | -0.002<br>(0.023)    | -0.004<br>(0.023)   | -0.009<br>(0.028)     | -0.020<br>(0.048)      |
| Upper secondary and above                                   | -0.047<br>(0.030)    | -0.048<br>(0.030)   | -0.073*<br>(0.035)    | 0.024<br>(0.055)       |
| Parents' highest ISEI                                       | -0.001*<br>(0.001)   | -0.001*<br>(0.001)  | -0.001<br>(0.001)     | -0.003*<br>(0.001)     |
| Two-parent household                                        | 0.054*<br>(0.026)    | 0.052*<br>(0.026)   | 0.065*<br>(0.030)     | 0.002<br>(0.054)       |
| Ability score                                               | -0.017<br>(0.014)    | -0.018<br>(0.014)   | -0.025+<br>(0.015)    | 0.027<br>(0.033)       |
| Sampling school (ref.: lower secondary school)              |                      |                     |                       |                        |
| Comprehensive school                                        | -0.022<br>(0.039)    | -0.023<br>(0.039)   | -0.014<br>(0.043)     | -0.046<br>(0.062)      |
| Intermediate secondary school                               | -0.010<br>(0.028)    | -0.013<br>(0.028)   | 0.007<br>(0.031)      | -0.111*<br>(0.056)     |
| Grade German                                                | -0.016<br>(0.015)    | -0.017<br>(0.015)   | -0.017<br>(0.016)     | -0.016<br>(0.034)      |
| Grade math                                                  | 0.035**<br>(0.011)   | 0.034**<br>(0.011)  | 0.041**<br>(0.013)    | 0.006<br>(0.023)       |
| Intercept                                                   | 0.244**<br>(0.077)   | 0.355***<br>(0.095) | 0.284**<br>(0.105)    | 0.413+<br>(0.217)      |
| Number of cases                                             | 2,641                | 2,641               | 2,126                 | 515                    |

Source: National Educational Panel Study (NEPS): Starting Cohort 4, authors' own calculations. Missing data are multiply imputed (MID method). Federal state fixed effects, cluster robust standard errors (in parentheses). Reference category for migrant generation in Model 3b: 1st generation. Significance levels: + p<0.1, \* p<0.05, \*\* p<0.01, \*\*\* p<0.001.

Table A3: Linear probability regressions of being in dual VET in December 2012 (including interaction of SES and competence scores)

|                                                             | Model 1              | Model 2             | Model 3a<br>(natives) | Model 3b<br>(migrants) |
|-------------------------------------------------------------|----------------------|---------------------|-----------------------|------------------------|
| Migrant generation (ref.: natives)                          |                      |                     |                       |                        |
| 1st generation                                              | -0.219***<br>(0.045) | -0.165**<br>(0.050) |                       |                        |
| 2nd generation                                              | -0.173***<br>(0.033) | -0.110**<br>(0.042) |                       | 0.067<br>(0.055)       |
| 2.5 generation                                              | -0.095**<br>(0.033)  | -0.075*<br>(0.034)  |                       | 0.126*<br>(0.059)      |
| Number of named occupations                                 |                      |                     |                       |                        |
| Natives                                                     |                      | 0.010**<br>(0.004)  | 0.010*<br>(0.004)     | 0.014+<br>(0.008)      |
| Migrants                                                    |                      | -0.005<br>(0.007)   | -0.018<br>(0.015)     | 0.002<br>(0.010)       |
| Average ISEI of all named occupations                       |                      | -0.003*<br>(0.001)  | -0.003*<br>(0.001)    | -0.002<br>(0.002)      |
| Male                                                        | 0.247***<br>(0.020)  | 0.248***<br>(0.020) | 0.273***<br>(0.022)   | 0.157***<br>(0.047)    |
| Books in household                                          | -0.005<br>(0.008)    | -0.005<br>(0.008)   | -0.001<br>(0.009)     | -0.024<br>(0.018)      |
| Parents' highest education (ref.: lower secondary or below) |                      |                     |                       |                        |
| Intermediate secondary (+ VET)                              | -0.002<br>(0.023)    | -0.004<br>(0.023)   | -0.009<br>(0.028)     | -0.024<br>(0.049)      |
| Upper secondary and above                                   | -0.047<br>(0.030)    | -0.048<br>(0.030)   | -0.073*<br>(0.035)    | 0.024<br>(0.055)       |
| Parents' highest ISEI                                       | -0.001*<br>(0.001)   | -0.001*<br>(0.001)  | -0.001<br>(0.001)     | -0.003*<br>(0.001)     |
| Two-parent household                                        | 0.054*<br>(0.026)    | 0.052*<br>(0.026)   | 0.065*<br>(0.030)     | -0.001<br>(0.054)      |
| Ability score                                               | -0.005<br>(0.031)    | -0.011<br>(0.031)   | -0.024<br>(0.035)     | 0.086<br>(0.067)       |
| x Parents' highest ISEI                                     | -0.000<br>(0.001)    | -0.000<br>(0.001)   | -0.000<br>(0.001)     | -0.002<br>(0.002)      |
| Sampling school (ref.: lower secondary school)              |                      |                     |                       |                        |
| Comprehensive school                                        | -0.022<br>(0.039)    | -0.024<br>(0.039)   | -0.014<br>(0.043)     | -0.047<br>(0.062)      |
| Intermediate secondary school                               | -0.010<br>(0.028)    | -0.013<br>(0.028)   | 0.007<br>(0.031)      | -0.107+<br>(0.056)     |
| Grade German                                                | -0.016<br>(0.015)    | -0.017<br>(0.015)   | -0.017<br>(0.016)     | -0.013<br>(0.034)      |
| Grade math                                                  | 0.035**<br>(0.011)   | 0.034**<br>(0.011)  | 0.041**<br>(0.013)    | 0.004<br>(0.023)       |
| Intercept                                                   | 0.245**<br>(0.077)   | 0.355***<br>(0.095) | 0.284**<br>(0.105)    | 0.416+<br>(0.218)      |
| Number of cases                                             | 2,641                | 2,641               | 2,126                 | 515                    |

Source: National Educational Panel Study (NEPS): Starting Cohort 4, authors' own calculations. Missing data are multiply imputed (MID method). Federal state fixed effects, cluster robust standard errors (in parentheses). Reference category for migrant generation in Model 3b: 1st generation. Significance levels: + p<0.1, \* p<0.05, \*\* p<0.01, \*\*\* p<0.001.

Table A4: Native-migrant gaps and contribution of single network indicators (KHB)

|                                                  | 1st<br>generation | 2nd<br>generation | 2.5<br>generation | All          |
|--------------------------------------------------|-------------------|-------------------|-------------------|--------------|
| Initial gap                                      | -0.220            | -0.175            | -0.095            | -0.150       |
| Final gap                                        | -0.165            | -0.111            | -0.075            | -0.106       |
| Gap reduction                                    | -0.055            | -0.064            | -0.020            | -0.043       |
| Reduction due to single network characteristics: |                   |                   |                   |              |
| Number of named occupations: natives             | -0.037            | -0.039            | -0.014            | -0.028       |
|                                                  | <i>68.6%</i>      | <i>60.5%</i>      | <i>66.7%</i>      | <i>64.9%</i> |
| Number of named occupations: migrants            | -0.015            | -0.017            | -0.005            | -0.012       |
|                                                  | <i>27.4%</i>      | <i>27.2%</i>      | <i>25.9%</i>      | <i>26.7%</i> |
| Average ISEI of all named occupations            | -0.002            | -0.008            | -0.001            | -0.004       |
|                                                  | <i>4.0%</i>       | <i>12.3%</i>      | <i>7.3%</i>       | <i>8.4%</i>  |
| Number of cases                                  | 106               | 186               | 223               | 515          |

Source: National Educational Panel Study (NEPS): Starting Cohort 4, authors' own calculations.

Contribution is calculated using the KHB method. Contribution to total gap reduction in per cent in italics.

Values for all migrants together are calculated as the average value, weighted by group size. Missing data are multiply imputed (MID method). All percentages calculated using unrounded values.
